# Supplementary material for: Overview of the Antioxidant and Anti-Inflammatory Activities of Selected Plant Compounds and Their Metal Ions Complexes
Source: MDPI journal article supplement (doi:10.3390/molecules26164886), 2021-08-12
Supplement: s1 [file s1]

## Supporting materials

### Overview of the antioxidant and antiinflammatory activities of selected plant compounds and their metal ions complexes

Paulina Mucha<sup>\*1</sup>, Anna Skoczyńska<sup>2</sup>, Magdalena Małecka<sup>3</sup>, Paweł Hikisz<sup>4</sup>, Elzbieta Budzisz<sup>1\*</sup>

<sup>1</sup> Department of the Chemistry of Cosmetic Raw Materials, Faculty of Pharmacy, Medical University of Łódź, Muszyńskiego 1, 91-419, Poland,

<sup>2</sup> Department of Pharmacology, School of Pharmacy with the Division of Laboratory Medicine in Sosnowiec, Medical University of Silesia, Katowice, Sosnowiec 41-200, Poland [anna\\_sko@onet.pl](mailto:anna_sko@onet.pl)

<sup>3</sup> Department of Physical Chemistry, Faculty of Chemistry University of Lodz, Pomorska 163/165, 90-236, Łódź, Poland [magdalena.malecka@chemia.uni.lodz.pl](mailto:magdalena.malecka@chemia.uni.lodz.pl)

<sup>4</sup> Department of Molecular Biophysics, Faculty of Biology and Environmental Protection, University of Lodz, Pomorska 141/143, 90-236 Lodz, Poland, [pawel.hikisz@biol.uni.lodz.pl](mailto:pawel.hikisz@biol.uni.lodz.pl)

\* Correspondence: elzbieta.budzisz@umed.lodz.pl, paulina.mucha@umed.lodz.pl

**Table S1.** Antioxidant activity of chromones **36-41**.

| Compound  | DPPH IC <sub>50</sub> [μg/ml] | Fe <sup>2+</sup> ion chelating activity, | FTIC       | TBA        |
|-----------|-------------------------------|------------------------------------------|------------|------------|
|           |                               | IC <sub>50</sub> [μg/ml]                 |            |            |
| <b>36</b> | 49.5±0.02                     | 60.05±0.31                               | 94.78±0.03 | 92.26±0.54 |
| <b>37</b> | 11.82±0.04                    | 140.46±0.60                              | 88.17±0.30 | 86.58±0.19 |
| <b>38</b> | 10.24±0.15                    | 146.69±1.44                              | 93.95±0.42 | 93.25±1.76 |
| <b>39</b> | 13.95±0.03                    | 133.86±1.62                              | 94.28±0.23 | 90.96±1.12 |
| <b>40</b> | 11.49±0.17                    | 81.67±1.18                               | 93.42±0.19 | 90.56±0.16 |
| <b>41</b> | 12.15±0.07                    | 82.35±1.40                               | 88.92±0.47 | 90.51±1.58 |

**Table S2.** CRAC values for morin (**28**), quercetin (**3**), fisetin (**34**), catechin (**13**), chrysin (**32**) and their complexes with Fe(II) ions.

| Name of compound       | CRAC value x10 <sup>6</sup> ([Ce <sup>3+</sup> ]/molx1) <sup>-1</sup> |
|------------------------|-----------------------------------------------------------------------|
| Morin ( <b>28</b> )    | 666.28±9.84                                                           |
| Fe(II)-morin           | 768.01±1.92                                                           |
| Quercetin ( <b>3</b> ) | 476.20±7.59                                                           |
| Fe(II)-quercetin       | 628.13±11.36                                                          |
| Fisetin ( <b>34</b> )  | 341.04±10.02                                                          |
| Fe(II)-fisetin         | 436.16±6.01                                                           |
| Catechin ( <b>13</b> ) | 185.16±3.22                                                           |

|                 |              |
|-----------------|--------------|
| Fe(II)-catechin | 188.55±13.32 |
| Chrysin (32)    | 130.44±3.18  |
| Fe(II)-chrysin  | 140.84±10.94 |

**Table S3.** IC<sub>50</sub> values for DPPH free radical scavenging, total reductive capability and ferrous ion chelating of compounds.

| Compound         | R  | R <sub>1</sub>     | DPPH (IC <sub>50</sub> )<br>[μg/ml] | Total reductive<br>capability, IC <sub>50</sub> [μg/ml] | Fe <sup>2+</sup> ion chelating<br>activity, IC <sub>50</sub><br>[μg/ml] |
|------------------|----|--------------------|-------------------------------------|---------------------------------------------------------|-------------------------------------------------------------------------|
| 42               | H  | H                  | 64.75 ±0.11                         | 73.09±0.11                                              | 65.95±0.11                                                              |
| 43               | Br | H                  | 107.7±0.32                          | 108.17±0.31                                             | 105.01±0.31                                                             |
| 44               | H  | 4-Cl               | 70.14±0.10                          | 84.21±0.29                                              | 93.94±0.29                                                              |
| 45               | Br | 4-Cl               | 185.24±0.15                         | 217.20±0.21                                             | 189.29±0.21                                                             |
| 46               | H  | 4-CH <sub>3</sub>  | 56.19±0.18                          | 62.57±0.15                                              | 53.75±0.15                                                              |
| 47               | Br | 4-CH <sub>3</sub>  | 59.76±0.21                          | 69.17±0.20                                              | 59.45±0.20                                                              |
| 48               | H  | 4-OCH <sub>3</sub> | 54.14±0.13                          | 58.01±0.20                                              | 56.89±0.20                                                              |
| 49               | Br | 4-OCH <sub>3</sub> | 57.73±0.13                          | 65.52±0.17                                              | 62.30±0.17                                                              |
| 50               | H  | 4-NO <sub>2</sub>  | 92.15±0.17                          | 157.96±0.13                                             | 117.36±0.13                                                             |
| 51               | Br | 4-NO <sub>2</sub>  | 101.41±0.13                         | 289.02±0.13                                             | 153.87±0.13                                                             |
| 52               | H  | 4-F                | 88.29±0.21                          | 92.59±0.13                                              | 70.76±0.13                                                              |
| 53               | Br | 4-F                | 141.56±0.13                         | 133.90±0.13                                             | 131.02±0.13                                                             |
| Standard a, b, c |    |                    | 46.95±0.17                          | 50±0.15                                                 | 44.11±0.15                                                              |

a Std-BHT is used as standard for DPPH radical scavenging activity.

b Std-BHA is used as a standard for reductive capability

c Std-EDTA is used as a standard for Fe<sup>2+</sup> ion chelating activity.

**Table S4.** Percent of inhibition of 4H<sub>3</sub>NC and its complexes with Fe(II), Ni(II), Zn(II), Cu(II) ions.

| Compounds            | Inhibitions % |
|----------------------|---------------|
| 4H <sub>3</sub> NC   | 63.7          |
| 4H <sub>3</sub> NCFe | 0             |
| 4H <sub>3</sub> NCNi | 0             |
| 4H <sub>3</sub> NCZn | Not measured  |
| 4H <sub>3</sub> NCCu | 91.2          |
